# Supplementary material for: The Antioxidant and Anti-Inflammatory Effects of Flavonoids from Propolis via Nrf2 and NF-κB Pathways
Source: MDPI journal article supplement (doi:10.3390/foods11162439), 2022-08-13
Supplement: s1 [file s1]

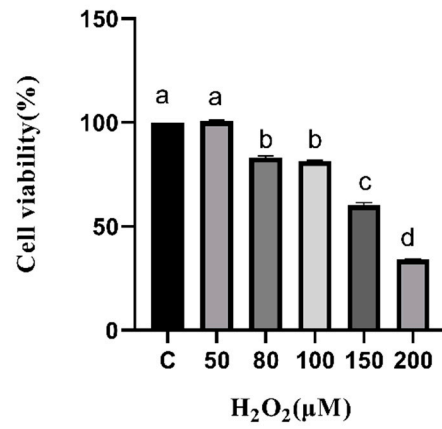

**Figure S1.** Cell viability of CCK-8 assays based on H9c2 cells. H9c2 cells were stimulated with different concentrations of H<sub>2</sub>O<sub>2</sub> (0, 50, 80, 100, 150, 200 μM) for 1 h and then the cell viability was detected by CCK-8 assay. **Values are expressed as the mean ± SEM (n = 6).** Values with different letters in the different column demonstrated significant difference at  $p < 0.05$ .

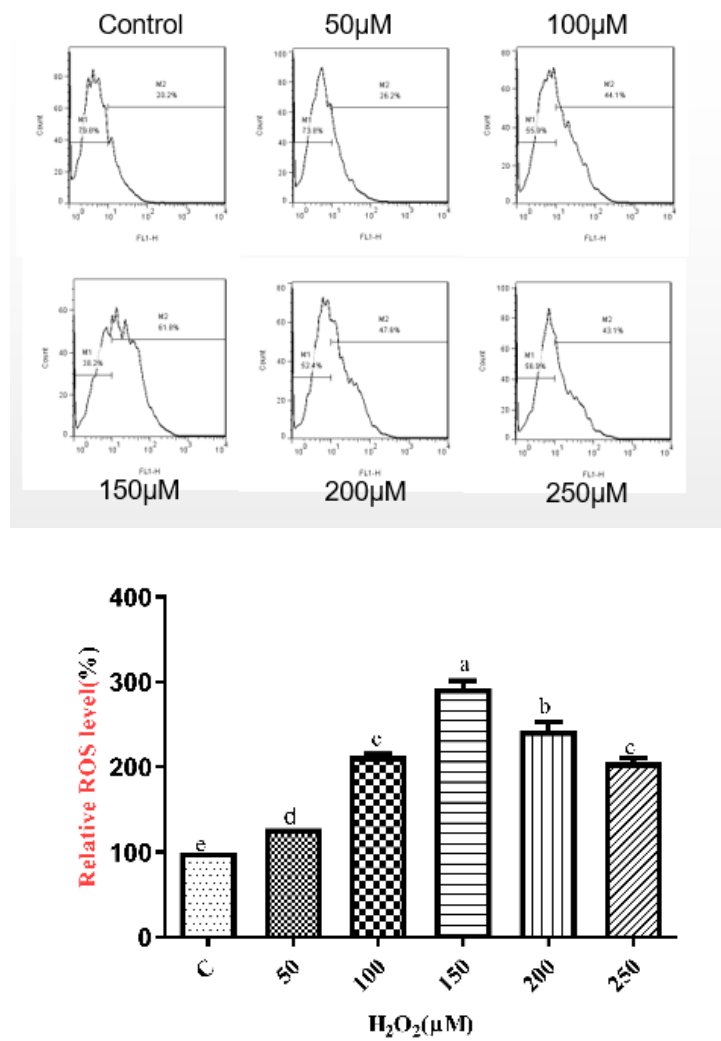

**Figure S2.** ROS level based on H<sub>2</sub>O<sub>2</sub>-induced H9c2 cells. H9c2 cells were stimulated with different concentrations of H<sub>2</sub>O<sub>2</sub> (0, 50, 100, 150, 200, 250 μM) for 1 h and then the ROS level was detected by Flow Cytometry. Values are expressed as the mean ± SEM (n = 3). Values with different letters in the different column demonstrated significant difference at  $p < 0.05$ .

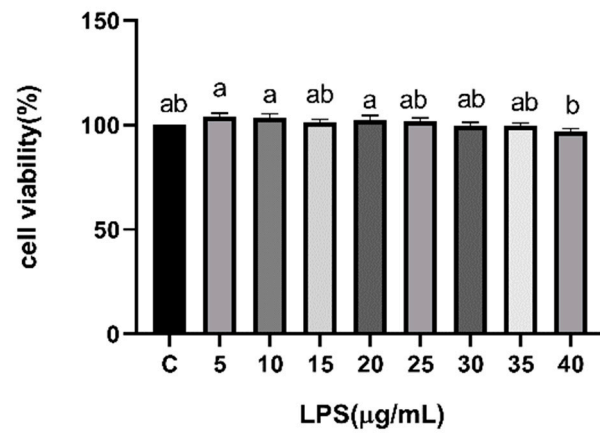

**Figure S3.** Cell viability of CCK-8 assays based on H9c2 cells. H9c2 cells were stimulated with different concentrations of LPS (0, 5, 10, 15, 20, 25, 30, 35, 40 µg/mL) for 12 h and then the cell viability was detected by CCK-8 assay. Values are expressed as the mean  $\pm$  SEM ( $n = 6$ ). Values with different letters in the different column demonstrated significant difference at  $p < 0.05$ .

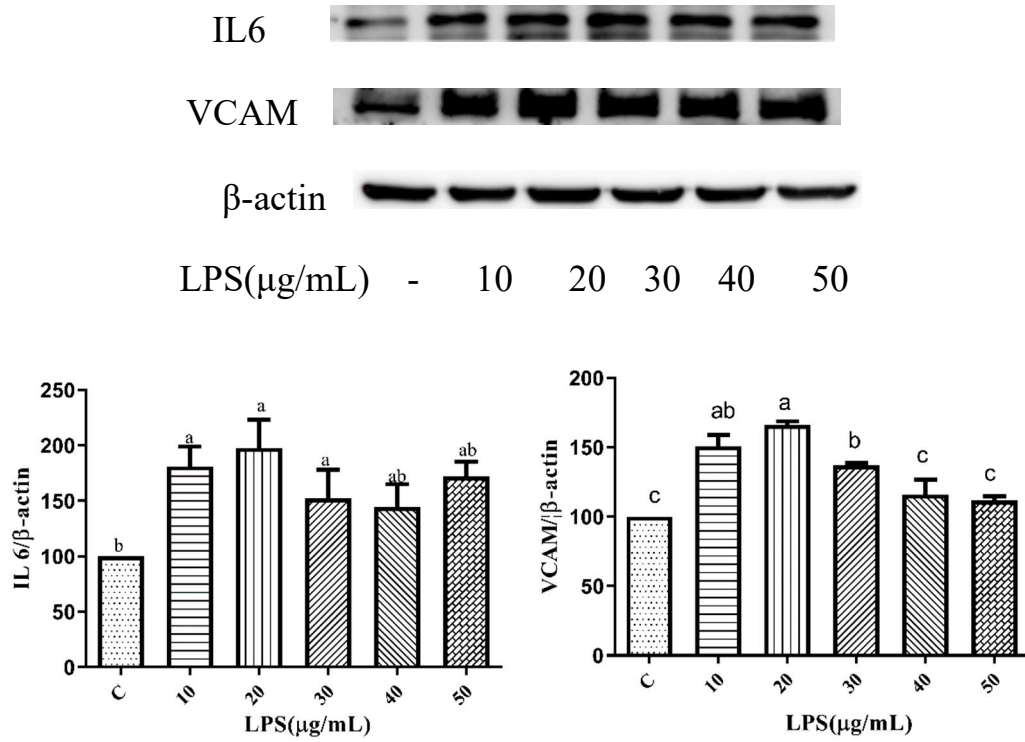

**Figure S4.** The expression of pro-inflammatory protein (VCAM1 and IL-6) based on LPS-induced H9c2 cells. Values are expressed as the mean  $\pm$  SEM (n = 3). Values with different letters in the different column demonstrated significant difference at  $p < 0.05$ .

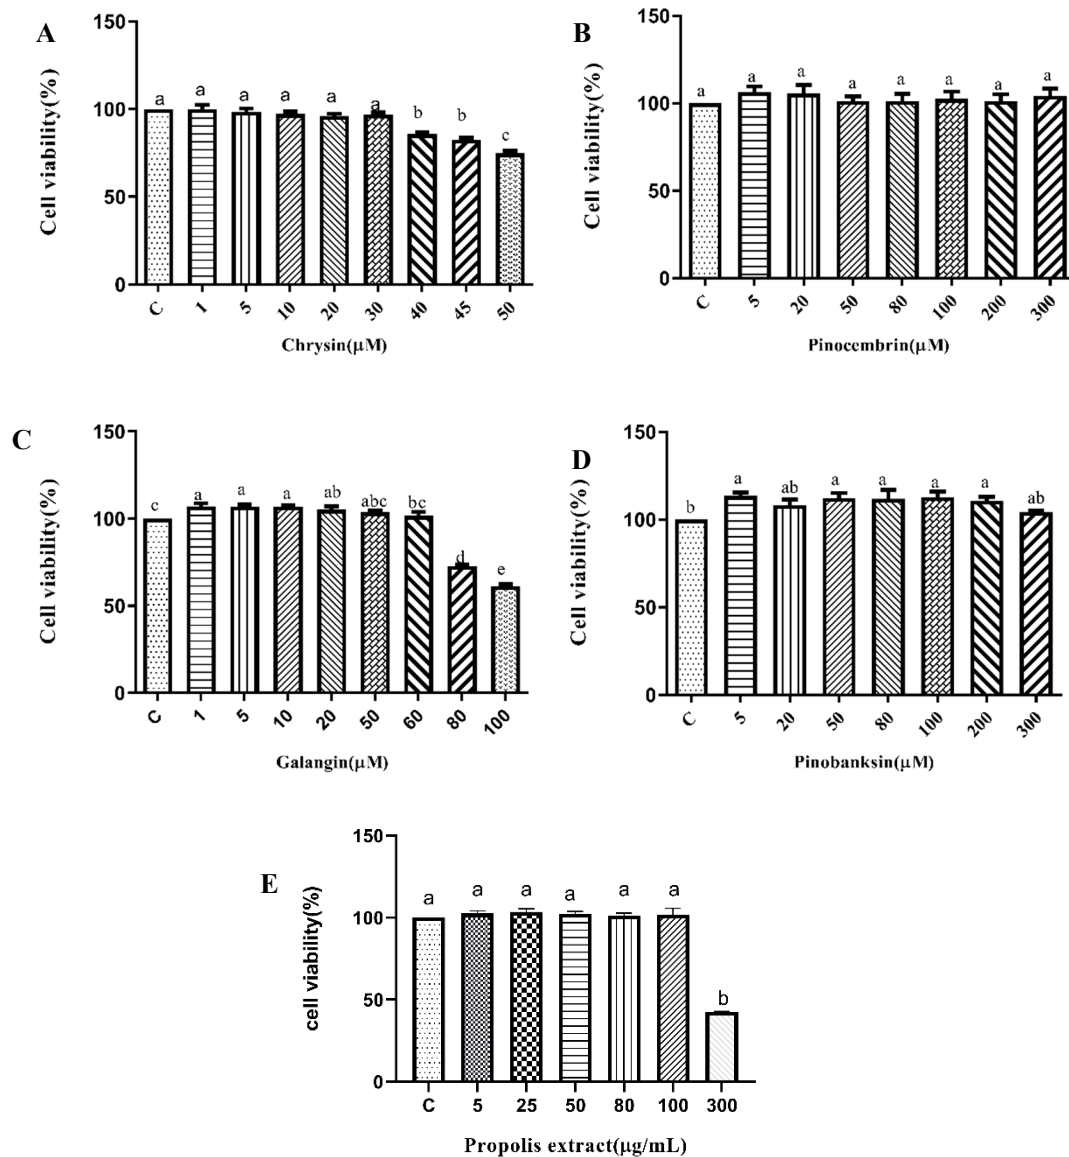

**Figure S5.** Cell viability of CCK-8 assays based on H9c2 cells. H9c2 cells were stimulated with different concentrations of individual flavonoids (chrysin, pinocembrin, galangin and pinobanksin) and propolis extract for 12 h and then the cell viability was detected by CCK-8 assay. (A) Cell viability of chrysin-induced H9c2 cells. (B) Cell viability of pinocembrin-induced H9c2 cells. (C) Cell viability of galangin-induced H9c2 cells. (D) Cell viability of pinobanksin -induced H9c2 cells. (E) Cell viability of propolis extract-induced H9c2 cells. **Values are expressed as the mean  $\pm$  SEM (n = 6).** Values with different letters in the different column demonstrated significant difference at  $p < 0.05$ .
